# Supplementary material
Source: MDPI journal article supplement (https://www.mdpi.com/2077-0472/14/2/259)
Supplement: s1 [file s1]

Archive with 3 entries (3 files):
- Supplementary material Figures S1-S4_TM.pdf
- Supplementary material Methods S1.pdf
- Supplementary material Methods S2_TM.pdf
