# Supplementary material
Source: MDPI journal article supplement (https://www.mdpi.com/2077-0472/14/2/259)
Supplement: s1 [file s1 › Supplementary material Figures S1-S4_TM.pdf]

## Supplementary material Figures S1-S4

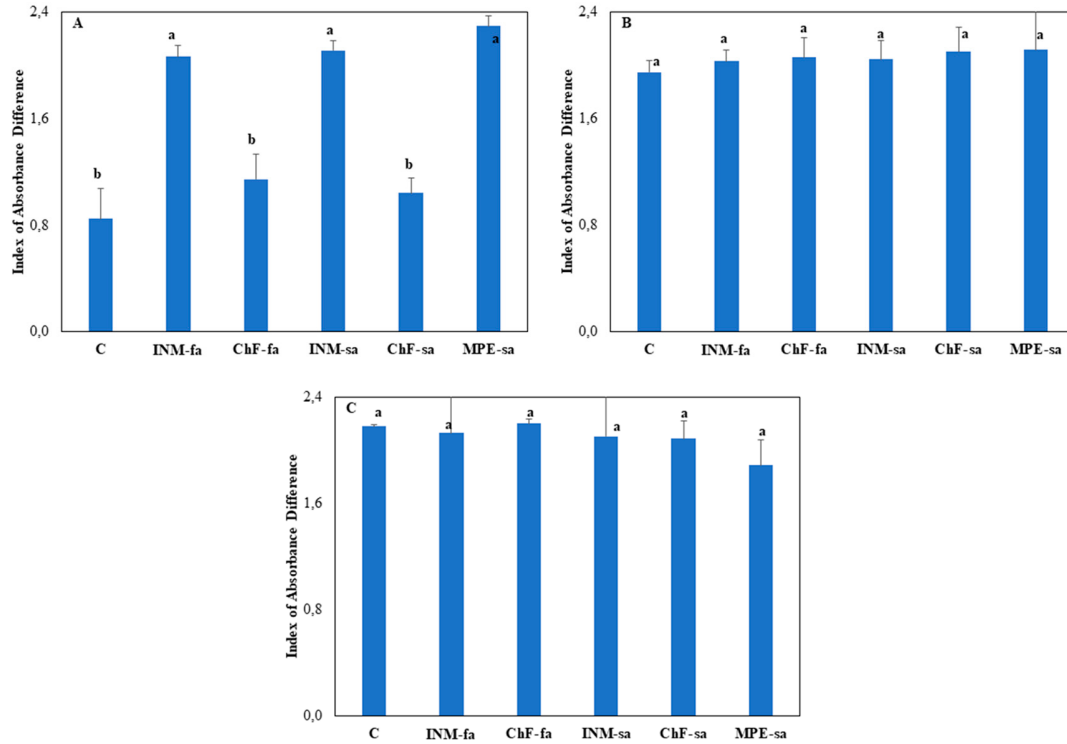

**Supplementary Figure S1.** Effect of the fertilization scheme and application method (root/foliar) on leaf index of absorbance difference of *Carlina diae*. C: Control (water); INM-fa: Integrated nutrient management (INM) by foliar application; ChF-fa: Chemical fertilization by foliar application; INM-sa: INM by soil application; ChF-sa: Chemical fertilization by soil application; MPE-sa: Mixture of plant extracts as biostimulant by soil application (THEOMASS). Values represent the mean of three replicates  $\pm$  SEM. Within each plot, different letters indicate significant differences.

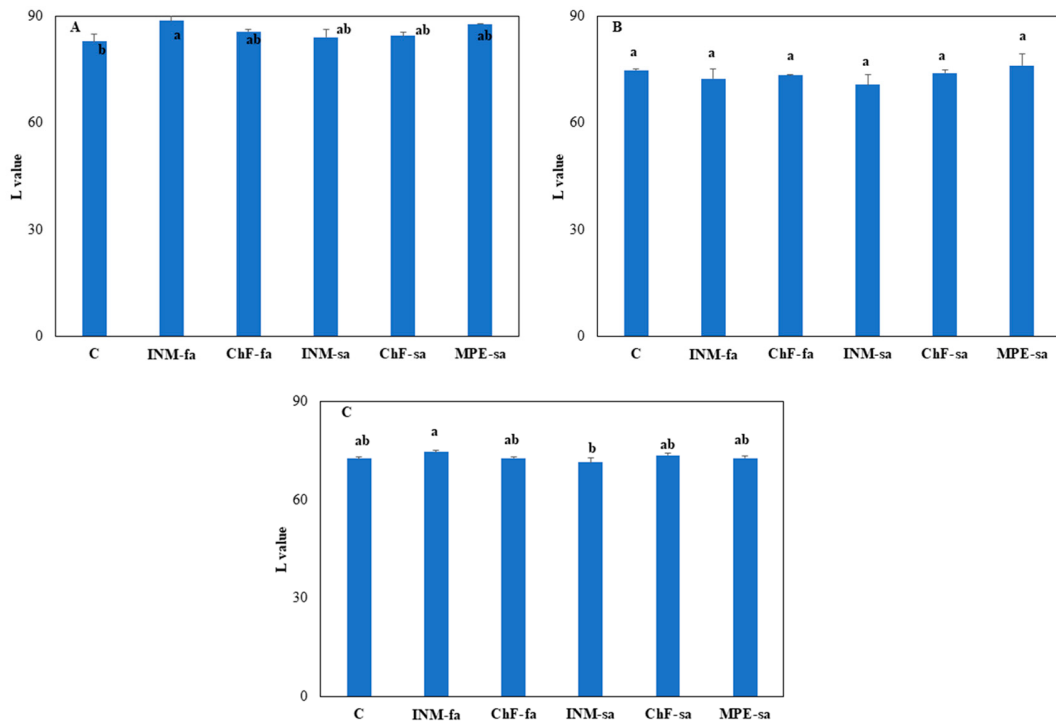

**Supplementary Figure S2.** Effect of the fertilization scheme and application method (root/foliar) on leaf L value of *Carlina diae*. C: Control (water); INM-fa: Integrated nutrient management (INM) by foliar application; ChF-fa: Chemical fertilization by foliar application; INM-sa: INM by soil application; ChF-sa: Chemical fertilization by soil application; MPE-sa: Mixture of plant extracts as biostimulant by soil application (THEOMASS). Values represent the mean of three replicates  $\pm$  SEM. Within each plot, different letters indicate significant differences.

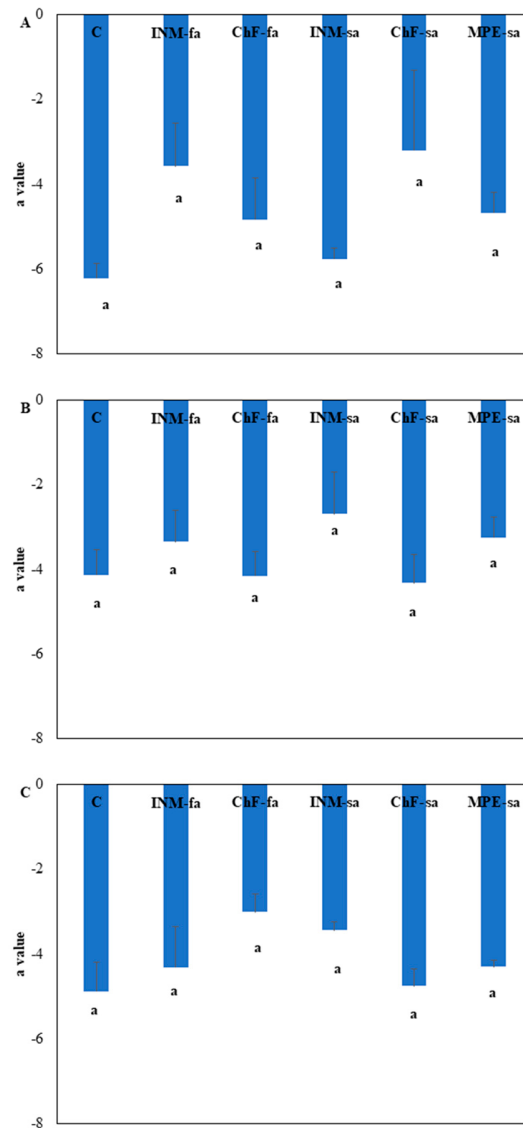

**Supplementary Figure S3.** Effect of the fertilization scheme and application method (root/foliar) on leaf “a” value of *Carlina diae*. C: Control (water); INM-fa: Integrated nutrient management (INM) by foliar application; ChF-fa: Chemical fertilization by foliar application; INM-sa: INM by soil application; ChF-sa: Chemical fertilization by soil application; MPE-sa: Mixture of plant extracts as biostimulant by soil application (THEOMASS). Values represent the mean of three replicates  $\pm$  SEM. Within each plot, different letters indicate significant differences.

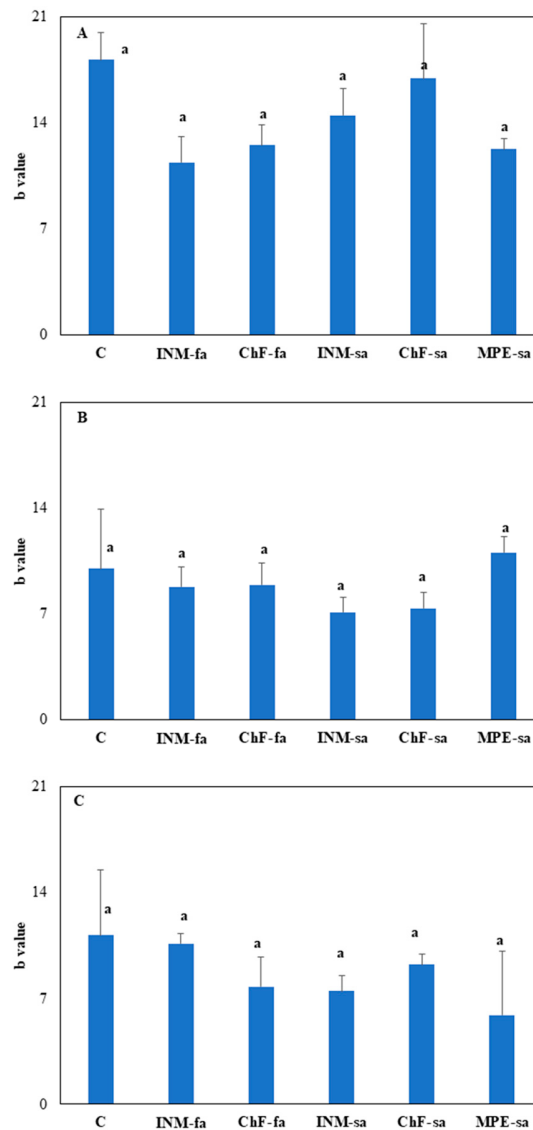

**Supplementary Figure S4.** Effect of the fertilization scheme and application method (root/foliar) on leaf “b” value of *Carlina diae*. C: Control (water); INM-fa: Integrated nutrient management (INM) by foliar application; ChF-fa: Chemical fertilization by foliar application; INM-sa: INM by soil application; ChF-sa: Chemical fertilization by soil application; MPE-sa: Mixture of plant extracts as bioreactor by soil application (THEOMASS). Values represent the mean of three replicates  $\pm$  SEM. Within each plot, different letters indicate significant differences.
